# Supplementary material for: Ethanol production by the hyperthermophilic archaeon Pyrococcus furiosus by expression of bacterial bifunctional alcohol dehydrogenases
Source: PubMed Central journal article supplement (PMC5658578; doi:10.1111/1751-7915.12486), 2017-02-14
Supplement: MBT2-10-1535-s001.pdf [file MBT2-10-1535-s001.pdf]

**Supporting Information**

**Ethanol Production by the Hyperthermophilic Archaeon *Pyrococcus furiosus* by  
Expression of Bacterial Bifunctional Alcohol Dehydrogenases**

Matthew W. Keller<sup>1†</sup>, Gina L. Lipscomb<sup>1†</sup>, Diep M. Nguyen<sup>1</sup>, Alexander T. Crowley<sup>1</sup>, Gerrit J.  
Schut<sup>1</sup>, Israel Scott<sup>1</sup>, Robert M. Kelly<sup>2</sup> and Michael W. W. Adams<sup>1\*</sup>

<sup>1</sup>Department of Biochemistry & Molecular Biology, University of Georgia,  
Athens, GA 30602

<sup>2</sup>Department of Chemical and Biomolecular Engineering,  
North Carolina State University, Raleigh, NC 27695

\*Address correspondence to [adamsm@uga.edu](mailto:adamsm@uga.edu)

†M.W.K. and G.L.L. contributed equally to this work.

**Table S1.** Amino acid sequence identity (%) among the eight AdhE proteins <sup>a</sup>

|           | <b>Te</b> | <b>Tx</b> | <b>Gs</b> | <b>Gt</b> | <b>Af</b> | <b>Ct</b> | <b>Tc</b> | <b>Dk</b> |
|-----------|-----------|-----------|-----------|-----------|-----------|-----------|-----------|-----------|
| <b>Te</b> | 100       | 97        | 67        | 68        | 68        | 52        | 54        | 65        |
| <b>Tx</b> | 97        | 100       | 68        | 68        | 68        | 52        | 54        | 65        |
| <b>Gs</b> | 67        | 68        | 100       | 97        | 88        | 51        | 53        | 63        |
| <b>Gt</b> | 64        | 68        | 97        | 100       | 89        | 51        | 54        | 63        |
| <b>Af</b> | 68        | 68        | 88        | 89        | 100       | 51        | 56        | 64        |
| <b>Ct</b> | 52        | 52        | 51        | 51        | 51        | 100       | 71        | 47        |
| <b>Tc</b> | 54        | 54        | 53        | 54        | 56        | 71        | 100       | 49        |
| <b>Dk</b> | 65        | 65        | 63        | 63        | 64        | 47        | 49        | 100       |

<sup>a</sup> Organism abbreviations are as follows: Te, *Thermoanaerobacter ethanolicus* JW200; Tx, *Thermoanaerobacter* sp. X514; Gs, *Geobacillus stearothermophilus* NUB3621; Gt, *Geobacillus thermoglucosidasius* NBRC 107763 Af, *Anoxybacillus flavithermus* WK1; Ct, *Clostridium thermocellum*; Tc, *Thermobrachium celere* DSM 8682; Dk, *Desulfotomaculum kuznetsovii* DSM 6115.

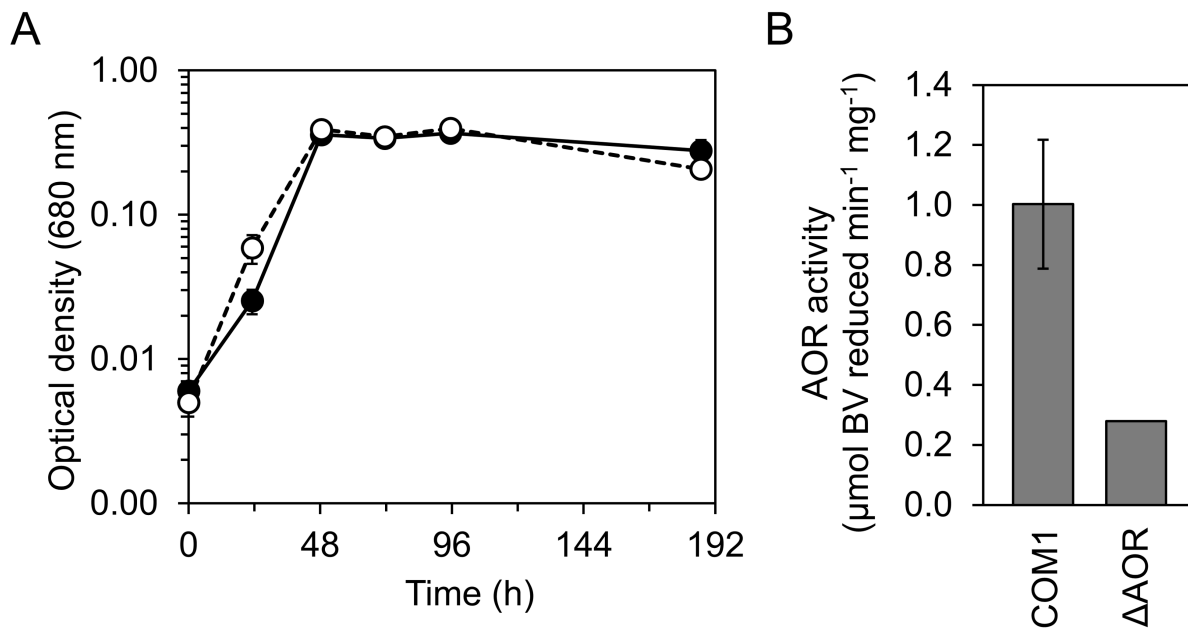

**Figure S1.** Deletion of *aor* does not affect growth of *P. furiosus* and abolishes 80% of aldehyde oxidoreductase activity. **A.** MW004 ( $\Delta pyrF::pyrF$ , black line with closed circles) and MW616 ( $\Delta pyrF \Delta aor::P_{gdh}pyrF$ , dashed line with open circles) strains were grown at 72°C for 72 h and then at 65°C up to 8 d in YM medium containing a total of 2 g L<sup>-1</sup> yeast extract. Error bars represent S.D.,  $n = 3$ . **B.** Aldehyde oxidoreductase (AOR) activity in cell extracts of COM1 ( $\Delta pyrF$ ) and  $\Delta AOR(\Delta pyrF \Delta aor)$ .

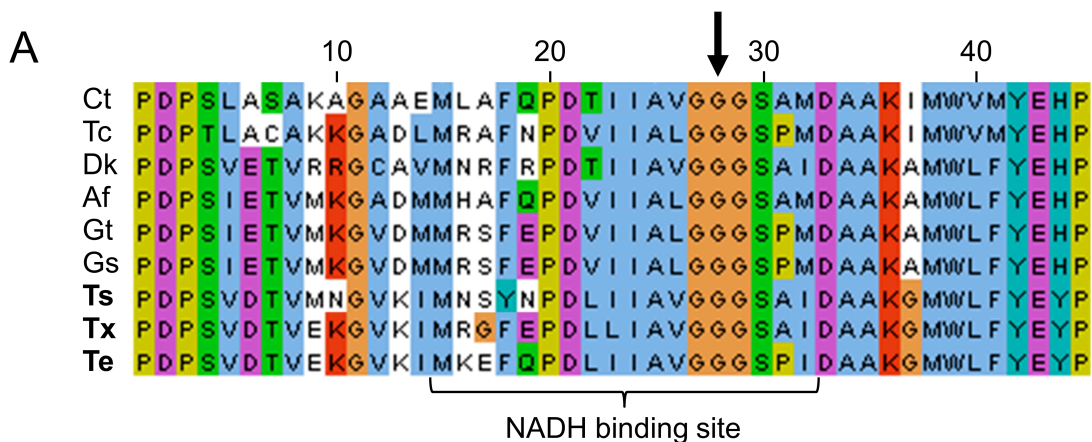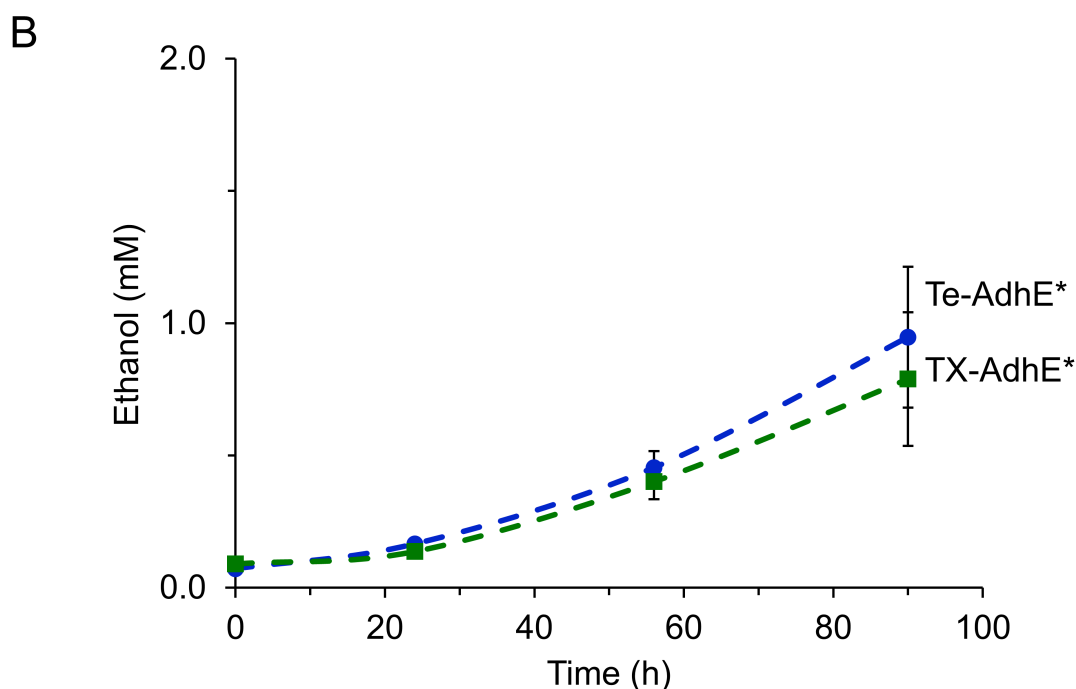

**Figure S2.** Nucleotide specificity mutation does not improve ethanol yield. **A.** Multiple alignment of ADH domain NADH binding site of selected AdhEs with *T. saccharolyticum* AdhE. Alignment performed using Clustal Omega (Sievers, et al., 2011) and visualized with Jalview (Clamp, et al., 2004). Location of NADH binding site is indicated with a bracket and the position of the G→D mutation (G544D in *T. saccharolyticum*) is indicated with an arrow. Organism abbreviations are as follows: Ct, *Clostridium thermocellum*; Tc, *Thermobrachium celere* DSM 8682; Dk, *Desulfotomaculum kuznetsovii* DSM 6115; Af, *Anoxybacillus flavithermus* WK1; Gt, *Geobacillus thermoglucosidasius* NBRC 107763; Gs, *Geobacillus stearothermophilus* NUB3621; Ts, *T. saccharolyticum*; Tx, *Thermoanaerobacter* sp. X514; Te, *Thermoanaerobacter ethanolicus* JW200. **B.** Ethanol production over time for Te-AdhE and Tx-AdhE, grown in closed serum bottles with 50 mL YM5 medium to mid-log phase at 95°C and then incubated at 65°C for 90 h. Error bars represent S.D.,  $n = 3$ .

## References

- 1 Sievers, F., Wilm, A., Dineen, D., Gibson, T.J., Karplus, K., Li, W., et al. (2011) Fast, scalable generation of high-quality protein multiple sequence alignments using Clustal Omega, *Molecular Systems Biology* **7**: 539-539.
- 2 Clamp, M., Cuff, J., Searle, S.M., and Barton, G.J. (2004) The jalview java alignment editor, *Bioinformatics* **20**: 426-427.
